# Supplementary material for: Characterizing the Impact of Package Type on Beer Stability
Source: Atypon-hosted journal article supplement (doi:10.1021/acsfoodscitech.2c00351), 2023-03-13
Supplement: fs2c00351_si_001.pdf [file fs2c00351_si_001.pdf]

## Supplemental Information

**Table S1. Annotated metabolites detected from GC-MS and HS-GC-MS analysis**

| Chemical Class        | Chemical Subclass   | Metabolite Name     | Chemical Formula                               | Detection Method | RT (sec) | Average MW | Reported Sensory      |
|-----------------------|---------------------|---------------------|------------------------------------------------|------------------|----------|------------|-----------------------|
| Organooxygen          | Alcohol and polyols | 2,3-Butanediol      | C <sub>4</sub> H <sub>10</sub> O <sub>2</sub>  | GC-MS            | 213.38   | 90.121     | butter, cream, fruity |
| Keto acid             | Alpha-keto acid     | Pyruvic acid        | C <sub>3</sub> H <sub>4</sub> O <sub>3</sub>   | GC-MS            | 220.62   | 88.0621    | na                    |
| Hydroxy acid          | Alpha hydroxy acid  | Lactic acid         | C <sub>3</sub> H <sub>6</sub> O <sub>3</sub>   | GC-MS            | 226.7    | 90.0779    | sour                  |
| Carboxylic acid       | Amino acid          | Alanine             | C <sub>3</sub> H <sub>7</sub> NO <sub>2</sub>  | GC-MS            | 248.32   | 89.0932    | na                    |
| Carboxylic acid       | Dicarboxylic acid   | Oxalic acid         | C <sub>2</sub> H <sub>2</sub> O <sub>4</sub>   | GC-MS            | 268.31   | 90.0349    | tart                  |
| Carboxylic acid       | Amino acid          | Isoleucine          | C <sub>6</sub> H <sub>13</sub> NO <sub>2</sub> | GC-MS            | 275.56   | 131.1729   | bitter                |
| Carboxylic acid       | Amino acid          | Valine              | C <sub>5</sub> H <sub>11</sub> NO <sub>2</sub> | GC-MS            | 308.31   | 117.1463   | mildly bitter         |
| Benzene               | na                  | Phenylethyl alcohol | C <sub>8</sub> H <sub>10</sub> O               | GC-MS            | 314.67   | 122.1644   | rose, honey           |
| Organic carbonic acid | Ureas               | Urea                | CH <sub>4</sub> N <sub>2</sub> O               | GC-MS            | 316.13   | 60.0553    | na                    |
| Organonitrogen        | Amines              | Ethanolamine        | C <sub>2</sub> H <sub>7</sub> NO               | GC-MS            | 335.79   | 61.0831    | na                    |
| Organooxygen          | Carbohydrate        | Glycerol            | C <sub>3</sub> H <sub>8</sub> O <sub>3</sub>   | GC-MS            | 338.64   | 92.0938    | sweet                 |
| Carboxylic acid       | Amino acid          | Leucine             | C <sub>6</sub> H <sub>13</sub> NO <sub>2</sub> | GC-MS            | 349.56   | 131.1729   | bitter                |
| Carboxylic acid       | Amino acid          | Proline             | C <sub>5</sub> H <sub>9</sub> NO <sub>2</sub>  | GC-MS            | 352.35   | 115.1305   | na                    |
| Carboxylic acid       | Dicarboxylic acid   | Succinic acid       | C <sub>4</sub> H <sub>6</sub> O <sub>4</sub>   | GC-MS            | 356.68   | 118.088    | sour, umami           |

|                     |                          |                          |          |       |        |          |                     |
|---------------------|--------------------------|--------------------------|----------|-------|--------|----------|---------------------|
| Carboxylic acid     | Amino acid               | Glycine                  | C2H5NO2  | GC-MS | 356.96 | 75.0666  | sweet               |
| Organooxygen        | Carbohydrate             | Glyceric acid            | C3H6O4   | GC-MS | 368.01 | 106.0773 | Na                  |
| Diazines            | Pyrimidines              | Uracil                   | C4H4N2O2 | GC-MS | 372.29 | 112.0868 | na                  |
| Diazines            | Pyrimidines              | Thymine                  | C5H6N2O2 | GC-MS | 404.34 | 126.1133 | na                  |
| Hydroxy acid        | Beta hydroxy acid        | Malic acid               | C4H6O5   | GC-MS | 446.17 | 134.0874 | tart, sour          |
| Carboxylic acid     | Amino acid               | Pyroglutamic acid        | C5H7NO3  | GC-MS | 464.1  | 129.114  | umami               |
| Carboxylic acid     | Amino acid               | 4-amino-Butanoic acid    | C4H9NO2  | GC-MS | 467.2  | 103.1198 | na                  |
| Phenol              | Tyrosols                 | Tyrosol                  | C8H10O2  | GC-MS | 485.22 | 138.1638 | mild, sweet, floral |
| Hydroxy acid        | Short-chain hydroxy acid | L-2-Hydroxyglutaric acid | C5H8O5   | GC-MS | 486.02 | 148.114  | na                  |
| Carboxylic acid     | Amino acid               | Glutamic acid            | C5H9NO4  | GC-MS | 505.87 | 147.1293 | sour, mild umami    |
| Carboxylic acid     | Amino acid               | Phenylalanine            | C9H11NO2 | GC-MS | 513.14 | 165.1891 | na                  |
| Carboxylic acid     | Amino acid               | Asparagine               | C4H8N2O3 | GC-MS | 531.13 | 132.1179 | na                  |
| Organooxygen        | Carbohydrate             | Unknown sugar 1          | na       | GC-MS | 537.98 | na       | na                  |
| Organooxygen        | Carbohydrate             | Xylitol                  | C5H12O5  | GC-MS | 551.75 | 152.1458 | sweet               |
| Organooxygen        | Carbohydrate             | Arabitol                 | C5H12O5  | GC-MS | 556.91 | 152.1458 | sweet               |
| Organonitrogen      | Amines                   | Putrescine               | C4H12N2  | GC-MS | 562.21 | 88.1515  | foul odor, rotting  |
| Glycerophospholipid | Glycerophosphate         | Glycerol-3-phosphate     | C3H9O6P  | GC-MS | 571.95 | 172.0737 | na                  |
| na                  | na                       | Known unknown 3          | na       | GC-MS | 575.86 | na       | na                  |

|                 |                            |                  |           |          |        |          |                                             |
|-----------------|----------------------------|------------------|-----------|----------|--------|----------|---------------------------------------------|
| na              | na                         | Sugar acid 1     | na        | GC-MS    | 584.18 | na       | na                                          |
| Carboxylic acid | Tricarboxylic acid         | Citric acid      | C6H8O7    | GC-MS    | 595.87 | 192.1235 | tart, sour                                  |
| na              | na                         | Known unknown 5  | na        | GC-MS    | 614.17 | na       | na                                          |
| Organooxygen    | Carbohydrate               | Fructose         | C6H12O6   | GC-MS    | 621.28 | 180.1559 | sweet, fruity aroma                         |
| Organooxygen    | Carbohydrate               | Unknown sugar 2  | na        | GC-MS    | 625.24 | na       | na                                          |
| Organooxygen    | Carbohydrate               | Glucose          | C6H12O6   | GC-MS    | 632.28 | 180.1559 | sweet                                       |
| Organooxygen    | Carbohydrate               | Unknown sugar 3  | na        | GC-MS    | 639.83 | na       | na                                          |
| Carboxylic acid | Amino acid                 | Tyrosine         | C9H11NO3  | GC-MS    | 642.55 | 181.1885 | bitter                                      |
| Organooxygen    | Carbohydrate               | Mannitol         | C6H14O6   | GC-MS    | 645.49 | 182.1718 | sweet                                       |
| Organooxygen    | Alcohol                    | myo-Inositol     | C6H12O6   | GC-MS    | 706.02 | 180.1559 | neutral                                     |
| Organooxygen    | Carbohydrate               | Sucrose          | C12H22O11 | GC-MS    | 917.23 | 342.1162 | sweet                                       |
| Organooxygen    | Carbohydrate               | Maltose          | C12H22O11 | GC-MS    | 925.45 | 342.2965 | sweet                                       |
| Organooxygen    | Carbohydrate               | Unknown sugar 4  | na        | GC-MS    | 936.9  | na       | na                                          |
| Organooxygen    | Carbohydrate               | Maltotriose      | C18H32O16 | GC-MS    | 1138.5 | 504.4371 | sweet                                       |
| Carboxylic acid | Carboxylic acid ester      | Ethyl Acetate    | C4H8O2    | HS-GC-MS | 462.74 | 88.1051  | nail polish remover, solvent, fruity, sweet |
| Organooxygen    | Alcohol                    | Isobutanol       | C4H10O    | HS-GC-MS | 559.57 | 74.1216  | malty, solvent                              |
| Carboxylic acid | Carboxylic acid derivative | Ethyl Propanoate | C5H10O2   | HS-GC-MS | 675.42 | 102.1317 | fruity, estery                              |
| Organooxygen    | Alcohol and polyols        | Isoamyl Alcohol  | C5H12O    | HS-GC-MS | 710.43 | 88.1482  | alcohol, banana, sweet, fusel               |

|                 |                            |                         |          |          |         |          |                                                       |
|-----------------|----------------------------|-------------------------|----------|----------|---------|----------|-------------------------------------------------------|
| Organoxygen     | Alcohol                    | Pentanol                | C5H12O   | HS-GC-MS | 797.43  | 88.1482  | sweet, balsamic, fusel                                |
| Lipid           | Fatty acid ester           | Ethyl Butyrate          | C6H12O2  | HS-GC-MS | 869.63  | 116.1583 | pineapple, mango, papaya, butter, sweet               |
| Carboxylic acid | Carboxylic acid derivative | 2-Pentyl Acetate        | C7H14O2  | HS-GC-MS | 999.81  | 130.1849 | citrus, spicy, ripe fruit, apple                      |
| Carboxylic acid | Carboxylic acid derivative | Isoamyl Acetate         | C7H14O2  | HS-GC-MS | 1027.46 | 130.1849 | banana                                                |
| Benzene         | Styene                     | Styrene                 | C8H8     | HS-GC-MS | 1066.59 | 104.1491 | plastic, sweet, floral, balsamic                      |
| Carboxylic acid | Carboxylic acid ester      | Isobutyl Isobutyrate    | C8H16O2  | HS-GC-MS | 1098.6  | 144.2114 | grape skin, pineapple, tropical                       |
| Lipid           | Monoterpenoid              | $\beta$ -pinene         | C10H16   | HS-GC-MS | 1196.12 | 136.234  | woody, green, resinous, dry                           |
| Lipid           | Monoterpenoid              | $\beta$ -myrcene        | C10H16   | HS-GC-MS | 1208.84 | 136.238  | peppery, spicy, citrus, resinous, piney, lemon, woody |
| Lipid           | Fatty acid ester           | Ethyl Hexanoate         | C8H16O2  | HS-GC-MS | 1237.21 | 144.2114 | apple, anise seed, citrus, solvent                    |
| Lipid           | Fatty acid ester           | Ethyl 5-methylhexanoate | C9H18O2  | HS-GC-MS | 1245.62 | 158.238  | na                                                    |
| Lipid           | Fatty acid ester           | Isoamyl Butyrate        | C9H18O2  | HS-GC-MS | 1270.74 | 158.238  | fruity, green, apricot, pear, banana                  |
| Lipid           | Fatty acid ester           | 2-Methylbutyl butyrate  | C9H18O2  | HS-GC-MS | 1282.7  | 158.238  | fruity, pear, apricot, tropical, spicy, apple         |
| Lipid           | Monoterpenoid              | Pinocarvone             | C10H14O  | HS-GC-MS | 1423.59 | 150.2176 | minty                                                 |
| Lipid           | Monoterpenoid              | Linalool                | C10H18O  | HS-GC-MS | 1447.21 | 154.253  | citrus, floral, rose, woody                           |
| Benzene         | na                         | 2-Phenylethanol         | C8H10O   | HS-GC-MS | 1522.74 | 122.1644 | alcohol, floral, honey, sweet rose                    |
| Lipid           | Fatty acid ester           | Ethyl Octanoate         | C10H20O2 | HS-GC-MS | 1570.01 | 172.2646 | apple, sweet, fruity, sour apple                      |
| Benzene         | na                         | Phenethyl Acetate       | C10H12O2 | HS-GC-MS | 1707.9  | 164.2011 | honey, floral, cabbage, fruity, rose, apply, sweet    |

|              |                  |                      |                                                |          |         |          |                                                         |
|--------------|------------------|----------------------|------------------------------------------------|----------|---------|----------|---------------------------------------------------------|
| Organooxygen | Carbonyl         | 2-Undecanone         | C <sub>11</sub> H <sub>22</sub> O              | HS-GC-MS | 1743.71 | 170.2918 | varnish, bitter, green plants, geranium, fruity, citrus |
| Lipid        | Monoterpenoid    | Methyl Geranate      | C <sub>11</sub> H <sub>18</sub> O <sub>2</sub> | HS-GC-MS | 1765.54 | 182.263  | waxy, green, fruity, floral, citrus                     |
| Lipid        | Fatty acid ester | Ethyl Decanoate      | C <sub>12</sub> H <sub>24</sub> O <sub>2</sub> | HS-GC-MS | 1849.09 | 200.3178 | caprylic, soapy, estery                                 |
| Lipid        | Sesquiterpenoid  | Humulene             | C <sub>15</sub> H <sub>24</sub>                | HS-GC-MS | 1961.06 | 204.357  | spicy, herbal, grassy, woody, clove                     |
| Lipid        | Sesquiterpenoid  | $\alpha$ -calacorene | C <sub>15</sub> H <sub>20</sub>                | HS-GC-MS | 2068.97 | 200.3196 | citrus, spicy, woody                                    |
| Lipid        | Fatty acid ester | Ethyl Dodecanoate    | C <sub>14</sub> H <sub>28</sub> O <sub>2</sub> | HS-GC-MS | 2102.07 | 228.3709 | caprylic, soapy, estery                                 |

Table S2. Linear models of metabolite abundance over aging time.

| Metabolite             | R <sup>2</sup> <sub>a</sub> | IPA                   |                        |        | AA       |           |        |
|------------------------|-----------------------------|-----------------------|------------------------|--------|----------|-----------|--------|
|                        |                             | Baseline <sub>b</sub> | OT <sub>c</sub> Bottle | OT Can | Baseline | OT Bottle | OT Can |
| Glycine                | 0.950                       | 0.58                  | No                     | No     | <0.001   | No        | No     |
| Tyrosine               | 0.990                       | 0.24                  | No                     | No     | <0.001   | No        | Yes    |
| Asparagine             | 0.940                       | 0.74                  | No                     | No     | <0.001   | No        | No     |
| Ethyl acetate          | 0.428 <sub>d</sub>          | 0.56                  | No                     | No     | 0.21     | No        | Yes    |
| Isobutyl isobutyrate   | 0.998                       | 0.96                  | No                     | No     | <0.001   | No        | No     |
| Ethyl decanoate        | 0.977                       | 0.88                  | No                     | No     | <0.001   | Yes       | Yes    |
| Ethyl octanoate        | 0.170                       | 0.04                  | Yes                    | No     | 0.06     | No        | Yes    |
| Ethyl hexanoate        | 0.687                       | 0.20                  | Yes                    | No     | 0.74     | No        | Yes    |
| 2-Methylbutyl butyrate | 0.997                       | 0.62                  | No                     | No     | <0.001   | No        | Yes    |
| Pinocarvone            | 0.994                       | 0.001                 | No                     | Yes    | 0.33     | No        | No     |
| β-myrcene              | 0.994                       | 0.05                  | Yes                    | Yes    | 0.76     | Yes       | Yes    |
| β-pinene               | 0.966                       | 0.06                  | No                     | No     | 0.41     | No        | No     |
| Humulene               | 0.980                       | <0.001                | Yes                    | Yes    | <0.001   | Yes       | Yes    |
| α-calacorene           | 0.964                       | 0.02                  | Yes                    | Yes    | 0.47     | Yes       | Yes    |
| Isobutanol             | 0.794                       | 0.02                  | No                     | No     | 0.43     | No        | No     |
| myo-Inositol           | 0.954                       | 0.14                  | No                     | No     | <0.001   | No        | Yes    |
| 2-Undecanone           | 0.991                       | 0.16                  | Yes                    | Yes    | 0.50     | No        | No     |

(a) Demonstrates fitness of a linear model after necessary transformations to meet assumptions of normality

(b) *P*-values produced from the *emmeans()* function in R Programming to determine significance in relative abundance in week 0 samples between cans and bottles within each style

(c) Over Time (OT) demonstrates if a linear model is significantly changing over the 24-week aging period with a 95% confidence interval in each style and package type, where YES indicates statistical significance and NO indicates no statistical significance.

Analysis performed by the *emtrends()* function in R Programming.

(d) Metabolites with R<sup>2</sup> values < 0.900 are highlighted in red and considered as an unacceptable model fit.
